# Supplementary material for: Mitral Valve Prolapse Induces Regionalized Myocardial Fibrosis
Source: PubMed Central journal article supplement — J Am Heart Assoc. 2021 Dec 7;10(24):e022332. doi: 10.1161/JAHA.121.022332 (PMC9075228; doi:10.1161/jaha.121.022332), 2021-12-07
Supplement: JAH3-10-e022332-s003.pdf [file JAH3-10-e022332-s003.pdf]

# **SUPPLEMENTAL MATERIAL**

**Table 1. Pre-operative baseline characteristics.**

| <b>Variable</b>                | <b>Patients<br/>(n=6)</b> |
|--------------------------------|---------------------------|
| Clinical data                  |                           |
| Age, years                     | 59.6 ± 5.7                |
| Age ≥ 70, n (%)                | 0 (0)                     |
| BMI                            | 24.2 ± 1.0                |
| Male, n (%)                    | 6 (100)                   |
| Atrial fibrillation, n (%)     | 1 (16.7)                  |
| Hypertension, n (%)            | 3 (50.0)                  |
| Diabetes, n (%)                | 0 (0.0)                   |
| Coronary artery disease, n (%) | 0 (0)                     |
| NYHA functional class III-IV   | 2 (33.3)                  |
| Echocardiographic data         |                           |
| LVEF (%)                       | 59.3 ± 4.6                |
| LVEDD (mm)                     | 61.8 ± 4.3                |
| LVESD (mm)                     | 43.3 ± 3.2                |
| PISA radius (cm)               | 1.2 ± 0.2                 |
| EROA (cm <sup>2</sup> )        | 0.5 ± 0.1                 |
| Regurgitant volume (ml)        | 69.3 ± 7.3                |
| Regurgitant fraction (%)       | 59.5 ± 9.6                |
| Vena contracta MR (mm)         | 7.2 ± 2.4                 |
| MR Grade 4+, n (%)             | 6 (100)                   |
| sPAP (mmHg)                    | 44.7 ± 17.4               |

NYHA: New York Heart Association; LVEF: left ventricular ejection fraction; LVEDD: left ventricular end diastolic diameter; LVESD: left ventricular end systolic diameter; PISA: proximal isovelocity surface area; EROA: effective regurgitant orifice area; MR, mitral regurgitation; sPAP: systolic pulmonary artery pressure.

Tables S2, S3: Inputs for computational modeling parameters.

Species information

| module           | ID            | name                                                 | Yinit | Ymax | tau | type      | gene name              | notes |
|------------------|---------------|------------------------------------------------------|-------|------|-----|-----------|------------------------|-------|
| g-coupled        | AngII         | angiotensin II                                       | 0     | 1    | 1   | 1 protein | AGT                    |       |
| g-coupled        | AT1R          | angiotensin II receptor type 1                       | 0     | 1    | 0.1 | protein   | AGTR1;AGTR2            |       |
| g-coupled        | AGT           | angiotensinogen                                      | 0     | 1    | 10  | protein   | AGT                    |       |
| g-coupled        | ACE           | angiotensin converting enzyme                        | 0     | 1    | 0.1 | protein   | ACE; ACE2              |       |
| g-coupled        | NOX           | NAD(P)H oxidase                                      | 0     | 1    | 0.1 | protein   | NOX4; NOX5             |       |
| g-coupled        | ROS           | reactive oxygen species                              | 0     | 1    | 0.1 | protein   |                        |       |
| g-coupled        | ET1           | endothelin 1                                         | 0     | 1    | 1   | protein   | EDN1                   |       |
| g-coupled        | ETAR          | endothelin 1 receptor A                              | 0     | 1    | 0.1 | protein   | EDNRA                  |       |
| g-coupled        | DAG           | diacyl-glycerol                                      | 0     | 1    | 0.1 | small     |                        |       |
| g-coupled        | PKC           | protein kinase C                                     | 0     | 1    | 0.1 | protein   | PRKCA; PRKCE;          |       |
| pressure/stretch | TRPC          | transient receptor potential canonical               | 0     | 1    | 0.1 | protein   | TRPC6;TRPC3            |       |
| g-coupled        | NE            | norepinephrine                                       | 0     | 1    | 1   | small     |                        |       |
| g-coupled        | BAR           | beta adrenergic receptor 1 or 2                      | 0     | 1    | 0.1 | protein   | ADRB1; ADRB2           |       |
| g-coupled        | Forskolin     |                                                      | 0     | 1    | 1   | small     |                        |       |
| g-coupled        | AC            | adenylate cyclase                                    | 0     | 1    | 0.1 | protein   | ADCY6                  |       |
| g-coupled        | cAMP          | cyclic adenosine monophosphate                       | 0     | 1    | 0.1 | small     |                        |       |
| g-coupled        | PKA           | protein kinase A                                     | 0     | 1    | 0.1 | protein   | PRKACA                 |       |
| g-coupled        | CREB          | cAMP response-element binding protein                | 0     | 1    | 0.1 | protein   | CREB1; CREB3           |       |
| g-coupled        | CBP           | CREB - binding protein                               | 0     | 1    | 0.1 | protein   | CREBBP                 |       |
| growth factor    | TGFB          | transforming growth factor beta 1                    | 0     | 1    | 1   | protein   | TGFB1                  |       |
| growth factor    | TGFB1R        | TGFB receptor                                        | 0     | 1    | 0.1 | protein   | TGFBRI; TGFBRI2        |       |
| growth factor    | smad3         | small mothers against decapentaplegic 2 and 3        | 0     | 1    | 0.1 | protein   | SMAD2; SMAD3           |       |
| growth factor    | smad7         |                                                      | 0     | 1    | 10  | protein   | SMAD7                  |       |
| growth factor    | latentTGFB    | TGFB1 with latent protein complex                    | 0     | 1    | 10  | protein   | TGFB1                  |       |
| growth factor    | BAMBI         | BMP and activin bound inhibitor                      | 0     | 1    | 0.1 | protein   | BAMBI                  |       |
| growth factor    | PDGF          | platelet derived growth factor                       | 0     | 1    | 1   | protein   | PDGFA; PDGFB; PDGFD    |       |
| growth factor    | PDGFR         | platelet derived growth factor receptor              | 0     | 1    | 0.1 | protein   | PDGFRA; PDGFRB         |       |
| g-coupled        | NP            | natriuretic peptide                                  | 0     | 1    | 1   | protein   | NPPA; NPPB             |       |
| g-coupled        | NPRA          | natriuretic peptide receptor                         | 0     | 1    | 0.1 | protein   | NPR1; NPR2; NPR3       |       |
| g-coupled        | cGMP          | cyclic guanosine monophosphate                       | 0     | 1    | 0.1 | small     |                        |       |
| g-coupled        | PKG           | protein kinase G                                     | 0     | 1    | 0.1 | protein   | PRKG1                  |       |
| pressure/stretch | tension       | stretch                                              | 0     | 1    | 1   | process   |                        |       |
| pressure/stretch | B1int         | beta 1 integrin                                      | 0     | 1    | 0.1 | protein   | ITGB1                  |       |
| pressure/stretch | Rho           | a Rho-dependent GTPase                               | 0     | 1    | 0.1 | protein   | RHOA                   |       |
| pressure/stretch | ROCK          | rho associated protein kinase                        | 0     | 1    | 0.1 | protein   | ROCK1                  |       |
| pressure/stretch | Ca            | calcium                                              | 0     | 1    | 0.1 | small     |                        |       |
| pressure/stretch | calcineurin   | calcineurin                                          | 0     | 1    | 0.1 | protein   | PPP3CA; PPP3CB         |       |
| pressure/stretch | NFAT          | nuclear factor of activated T-cells                  | 0     | 1    | 0.1 | protein   | NFATC1                 |       |
| cytokine         | IL6           | interleukin-6                                        | 0     | 1    | 1   | protein   | IL6                    |       |
| cytokine         | gp130         | IL-6 receptor complexed to gp130 for signal trans    | 0     | 1    | 0.1 | protein   | IL6ST; IL6R            |       |
| cytokine         | STAT          | signal transducers and activators of transcription 1 | 0     | 1    | 0.1 | protein   | STAT1; STAT3           |       |
| cytokine         | IL1           | interleukin-1 alpha and beta                         | 0     | 1    | 1   | protein   | IL1B; IL1A             |       |
| cytokine         | IL1RI         | IL1 receptor type I                                  | 0     | 1    | 0.1 | protein   | IL1RI                  |       |
| cytokine         | TNFa          | tissue necrosis factor alpha                         | 0     | 1    | 1   | protein   | TNF                    |       |
| cytokine         | TNFaR         | TNF alpha receptor                                   | 0     | 1    | 0.1 | protein   | TNFRSF1A;TNFRSF1B      |       |
| cytokine         | NFKB          | nuclear factor kappa-light-chain-enhancer of activ   | 0     | 1    | 0.1 | protein   | NFKB1                  |       |
| cytokine         | PI3K          | phosphoinositide 3-kinase                            | 0     | 1    | 0.1 | protein   | PIK3CA                 |       |
| cytokine         | Akt           | protein kinase B                                     | 0     | 1    | 0.1 | protein   | AKT1; AKT2; AKT3       |       |
| MAPK             | p38           | a MAP kinase                                         | 0     | 1    | 0.1 | protein   | MAPK14                 |       |
| MAPK             | TRAF          | tnf receptor associated factor either 2/6            | 0     | 1    | 0.1 | protein   | TRAF6                  |       |
| MAPK             | ASK1          | apoptosis signal related kinase 1                    | 0     | 1    | 0.1 | protein   | MAP3K5                 |       |
| MAPK             | MKK3          | mitogen activated protein kinase kinase              | 0     | 1    | 0.1 | protein   | MAP2K3                 |       |
| MAPK             | PP1           | protein phosphatase 1                                | 0     | 1    | 0.1 | protein   | PPP1CA; PPP1CB; PPP1CC |       |
| MAPK             | JNK           | a MAP kinase                                         | 0     | 1    | 0.1 | protein   | MAPK8                  |       |
| MAPK             | abl           | abl tyrosine kinase                                  | 0     | 1    | 0.1 | protein   | ABL1; ABL2             |       |
| MAPK             | Rac1          | a Rho-dependent GTPase                               | 0     | 1    | 0.1 | protein   | RAC1                   |       |
| MAPK             | MEKK1         | a MAP3K associated with p38 and JNK                  | 0     | 1    | 0.1 | protein   | MAP3K1                 |       |
| MAPK             | MKK4          | a MAP2K associated with p38 and JNK                  | 0     | 1    | 0.1 | protein   | MAP2K4                 |       |
| MAPK             | ERK           | a MAP kinase                                         | 0     | 1    | 0.1 | protein   | MAPK1; MAPK3           |       |
| MAPK             | Ras           | representing the family of GTPases                   | 0     | 1    | 0.1 | protein   | KRAS                   |       |
| MAPK             | Raf           | family of raf protein serine/threonine kinases       | 0     | 1    | 0.1 | protein   | RAF1                   |       |
| MAPK             | MEK1          | a MAP2K mainly specific to ERK                       | 0     | 1    | 0.1 | protein   | MAP2K1                 |       |
| adhesion         | FAK           | focal adhesion kinase                                | 0     | 1    | 0.1 | protein   | PTK2                   |       |
| g-coupled        | epac          | exchange protein activated by cAMP 1                 | 0     | 1    | 0.1 | protein   | RAPGEF3                |       |
| adhesion         | Factin        | polymerized actin                                    | 0     | 1    | 1   |           | ACTG1                  |       |
| adhesion         | FA            | stabilization of focal adhesions                     | 0     | 1    | 1   | complex   |                        |       |
| growth           | cmyc          | myc transcription factor                             | 0     | 1    | 0.1 | protein   | MYC                    |       |
| growth           | CTGF          | connective tissue growth factor                      | 0     | 1    | 0.1 | protein   | CTGF                   |       |
| growth           | proliferation | proliferation                                        | 0     | 1    | 10  | event     |                        |       |
| adhesion         | SRF           | serum response factor                                | 0     | 1    | 0.1 | protein   | SRF                    |       |
| ECM              | EDAFN         | extra domain A of fibronectin                        | 0     | 1    | 10  | protein   | FN1                    |       |
| adhesion         | aSMA          | alpha-smooth muscle actin                            | 0     | 1    | 10  | protein   | ACTA2                  |       |
| MAPK             | AP1           | activator protein 1                                  | 0     | 1    | 0.1 | protein   | JUN; FOS               |       |
| ECM              | TIMP1         | tissue inhibitor of metalloproteinase 1              | 0     | 1    | 10  | protein   | TIMP1                  |       |
| ECM              | TIMP2         | tissue inhibitor of metalloproteinase 2              | 0     | 1    | 10  | protein   | TIMP2                  |       |
| ECM              | PAI1          | plasminogen activator inhibitor 1                    | 0     | 1    | 10  | protein   | SERPINE1               |       |

|                  |                 |                                                       |   |   |     |         |             |
|------------------|-----------------|-------------------------------------------------------|---|---|-----|---------|-------------|
| ECM              | proMMP14        | inactive MMP14                                        | 0 | 1 | 10  | protein | MMP14       |
| ECM              | proMMP1         | inactive MMP1                                         | 0 | 1 | 10  | protein | MMP1        |
| ECM              | proMMP2         | inactive MMP2                                         | 0 | 1 | 10  | protein | MMP2        |
| ECM              | proMMP9         | inactive MMP9                                         | 0 | 1 | 10  | protein | MMP9        |
| ECM              | fibronectin     | fibronectin                                           | 0 | 1 | 10  | protein | FN1         |
| ECM              | periostin       | periostin                                             | 0 | 1 | 10  | protein | POSTN       |
| ECM              | proCI           | procollagen I                                         | 0 | 1 | 10  | protein | COL1A1      |
| ECM              | proCIII         | procollagen III                                       | 0 | 1 | 10  | protein | COL3A1      |
| pressure/stretch | B3int           | beta 3 integrin                                       | 0 | 1 | 0.1 | protein | ITGB3       |
| adhesion         | Src             | proto-oncogene tyrosine-protein kinase Src            | 0 | 1 | 0.1 | protein | SRC1        |
| MAPK             | Grb2            | growth factor receptor-bound protein 2                | 0 | 1 | 0.1 | protein | GRB2        |
| adhesion         | p130Cas         | breast cancer anti-estrogen resistance protein 1      | 0 | 1 | 0.1 | protein | BCAR1       |
| pressure/stretch | YAP             | yes-associated protein 1                              | 0 | 1 | 0.1 | protein | YAP1        |
| adhesion         | MRTF            | myocardin-related transcription factor A              | 0 | 1 | 0.1 | protein | MRTFA; MKL1 |
| adhesion         | Gactin          | monomeric actin                                       | 0 | 1 | 1   | protein | ACTG1       |
| ECM              | TNC             | tenascin-c                                            | 0 | 1 | 10  | protein | TNC         |
| growth           | mTORC1          | mammalian target of rapamycin complex 1               | 0 | 1 | 0.1 | complex |             |
| growth           | mTORC2          | mammalian target of rapamycin complex 2               | 0 | 1 | 0.1 | complex |             |
| growth           | p70S6K          | p70-S6 kinase 1                                       | 0 | 1 | 0.1 | protein | RPS6KB1     |
| growth           | EBP1            | eukaryotic translation initiation factor 4E-binding 1 | 0 | 1 | 0.1 | protein | EIF4EBP1    |
| pressure/stretch | syndecan4       | syndecan 4                                            | 0 | 1 | 0.1 | protein | SDC4        |
| ECM              | proMMP3         | inactive MMP3                                         | 0 | 1 | 1   | protein | MMP3        |
| ECM              | proMMP8         | inactive MMP8                                         | 0 | 1 | 1   | protein | MMP8        |
| ECM              | proMMP12        | inactive MMP12                                        | 0 | 1 | 1   | protein | MMP12       |
| ECM              | thrombospondin4 | thrombospondin 4                                      | 0 | 1 | 10  | protein | THBS4       |
| ECM              | osteopontin     | osteopontin                                           | 0 | 1 | 10  | protein | SPP1        |
| adhesion         | contractility   | intracellular tension                                 | 0 | 1 | 10  | event   |             |
| pressure/stretch | RhoGEF          | a Rho guanine nucleotide exchange factor              | 0 | 1 | 0.1 | protein |             |
| pressure/stretch | RhoGDI          | a Rho GDP-dissociation inhibitor                      | 0 | 1 | 0.1 | protein |             |
| adhesion         | tal1            | tal1 1                                                | 0 | 1 | 0.1 | protein | TLN1        |
| adhesion         | vinculin        | vinculin                                              | 0 | 1 | 0.1 | protein | VCL         |
| adhesion         | paxillin        | paxillin                                              | 0 | 1 | 0.1 | protein | PXN         |
| adhesion         | MLC             | myosin regulatory light chain                         | 0 | 1 | 0.1 | protein | MYL2        |
| Cilia            | PKD1            | polycystin-1                                          | 0 | 1 | 1   | protein |             |
| Cilia            | PKD2            | polycystin-2                                          | 0 | 1 | 1   | protein |             |
| pressure/stretch | TRPV4           | TRPV channel                                          | 0 | 1 | 1   | protein |             |
| g-coupled        | IP3R            | inositol triphosphate receptor                        | 0 | 1 | 1   | protein |             |
| Cilia            | DZIP1           | DAZ Interacting Zinc Finger Protein 1                 | 0 | 1 | 1   | protein |             |
| Cilia            | CBY1            | Protein chibby homolog 1                              | 0 | 1 | 1   | protein |             |
| cytokine         | Beatenin        | Beta-catenin                                          | 0 | 1 | 1   | protein |             |
| g-coupled        | SMO             | Smoothed                                              | 0 | 1 | 1   | protein |             |
| cytokine         | DHH             | Desert Hedgehog                                       | 0 | 1 | 1   | protein |             |
| cytokine         | TIAM1           | T-lymphoma invasion and metastasis-inducing pro       | 0 | 1 | 1   | protein |             |
| cytokine         | WNT             | WNT                                                   | 0 | 1 | 1   | protein |             |
| cytokine         | Pak1            | p21 (Rac1) Activated Kinase 1                         | 0 | 1 | 1   | protein |             |
| cytokine         | Flna            | filamin-a                                             | 0 | 1 | 1   | protein |             |
| cytokine         | Hic5            | Transforming Growth Factor Beta 1 Induced Tra         | 0 | 1 | 1   | protein |             |
| cytokine         | Ptch1           | Patched 1                                             | 0 | 1 | 1   | protein |             |
| cytokine         | Gli2            | GLI Family Zinc Finger 2                              | 0 | 1 | 1   | protein |             |
| cytokine         | Runx2           | HH pathway transcription factor                       | 0 | 1 | 1   | protein |             |
| ECM              | ADAMTS4         | A Disintegrin and Metalloproteinase with Thromb       | 0 | 1 | 10  | protein |             |
| ECM              | ADAMTS5         | A Disintegrin and Metalloproteinase with Thrombc      | 0 | 1 | 10  | protein |             |
| ECM              | ADAMTS9         | A Disintegrin and Metalloproteinase with Thrombc      | 0 | 1 | 10  | protein |             |
| ECM              | proMMP13        | inactive MMP13                                        | 0 | 1 | 10  | protein |             |
| cytokine         | Fz              | Frazzled                                              | 0 | 1 | 1   | protein |             |
| cytokine         | Dvl             | Disheveled                                            | 0 | 1 | 1   | protein |             |
| cytokine         | Groucho         | Groucho                                               | 0 | 1 | 1   | protein |             |
| cytokine         | TCF             | TCF/LEF1 transcription factors                        | 0 | 1 | 1   | protein |             |
| ECM              | versican        | Versican                                              | 0 | 1 | 1   | protein |             |
| protein          | GSK3B           | GSK3B                                                 | 0 | 1 | 1   | protein |             |

**Reaction Information**

| module | ID  | Rule                            | Weight | n   | EC50 | source                                                | notes                                                | PMID     | Secondary Reference              | Tertiary Reference | AND references               |
|--------|-----|---------------------------------|--------|-----|------|-------------------------------------------------------|------------------------------------------------------|----------|----------------------------------|--------------------|------------------------------|
| input  | i1  | => AngII                        | 0.1    | 1.3 | 0.55 | neonatal rat cardiac fibroblasts                      | increased via RAS in hypertension and heart failure  | 10362677 |                                  |                    |                              |
| input  | i2  | => TGFβ                         | 0.1    | 1.3 | 0.55 |                                                       | increased in response to injury                      | 20538689 |                                  |                    |                              |
| input  | i3  | => tension                      | 0.1    | 1.3 | 0.55 |                                                       | increased with integrin stimulation                  | 9547793  |                                  |                    |                              |
| input  | i4  | => IL6                          | 0.1    | 1.3 | 0.55 |                                                       | increased in hypertension                            | 19234091 |                                  |                    |                              |
| input  | i5  | => IL1                          | 0.1    | 1.3 | 0.55 |                                                       |                                                      | 19631653 |                                  |                    |                              |
| input  | i6  | => TNFα                         | 0.1    | 1.3 | 0.55 |                                                       |                                                      | 10591022 |                                  |                    |                              |
| input  | i7  | => NE                           | 0.1    | 1.3 | 0.55 |                                                       | most likely NE signaling                             | 3948363  |                                  |                    |                              |
| input  | i8  | => PDGF                         | 0.1    | 1.3 | 0.55 |                                                       | increased post-MI                                    | 20538689 |                                  |                    |                              |
| input  | i9  | => ET1                          | 0.1    | 1.3 | 0.55 |                                                       | increased from stretch of vascular endothelial cells | 12695528 |                                  |                    |                              |
| input  | i10 | => NP                           | 0.1    | 1.3 | 0.55 |                                                       | increased in pressure                                | 17991884 |                                  |                    |                              |
| input  | i11 | => Forskolin                    | 0      | 1.3 | 0.55 |                                                       |                                                      |          |                                  |                    |                              |
| fback  | r1  | proMMP9 & latentTGFβ => TGFβ    | 0.25   | 1.3 | 0.55 | in vitro                                              | release of latent protein                            | 10652271 | MC3T3-E1                         | 12226090           |                              |
| fback  | r2  | proMMP2 & latentTGFβ => TGFβ    | 0.25   | 1.3 | 0.55 | in vitro                                              | release of latent protein                            | 10652271 | MC3T3-E1                         | 12226090           |                              |
| fback  | r3  | ACE & AGT => AngII              | 0.25   | 1.3 | 0.55 | neonatal cardiac fibroblasts                          | enzymatic modification                               | 10790312 | in vitro                         | 13295487           |                              |
| fback  | r4  | CREB & CBP => IL6               | 0.25   | 1.3 | 0.55 | neonatal rat cardiac fibroblasts                      | txn                                                  | 11597988 | mouse cardiac fibroblasts        | 16466739           | 10405202                     |
| fback  | r5  | NFKB => IL6                     | 0.25   | 1.3 | 0.55 | neonatal rat cardiac fibroblasts                      | txn                                                  | 11597988 |                                  | 16466739           |                              |
| fback  | r6  | API => IL6                      | 0.25   | 1.3 | 0.55 | neonatal cardiac fibroblasts                          | txn                                                  | 11597988 | sv40 murine cells                | 16466739           |                              |
| fback  | r7  | API => ET1                      | 0.25   | 1.3 | 0.55 | neonatal rat cardiac fibroblasts                      | txn                                                  | 12695528 | bovine aortic endothelial cells  | 1918021            |                              |
| middle | r8  | AngII => AT1R                   | 1      | 1.3 | 0.55 | neonatal cardiac fibroblasts                          | receptor binding                                     | 8348686  | adult rat cardiac fibroblasts    | 16024575           |                              |
| middle | r9  | AT1R => NOX                     | 1      | 1.3 | 0.55 | adult rat cardiac fibroblast                          | -                                                    | 15106793 | neonatal rat cardiac fibroblasts | 11597988           |                              |
| middle | r10 | NOX => ROS                      | 1      | 1.3 | 0.55 | adult rat cardiac fibroblast                          | enzymatic production                                 | 15106793 | adult rat cardiac fibroblasts    | 16531806           |                              |
| middle | r11 | IL6 => gp130                    | 1      | 1.3 | 0.55 | neonatal rat cardiac fibroblasts                      | receptor binding                                     | 19234091 | COS7 cells                       | 1602143            |                              |
| middle | r12 | ROS => ERK                      | 1      | 1.3 | 0.55 | neonatal rat cardiac fibroblasts                      | activation                                           | 11597988 | neonatal rat cardiac fibroblasts | 14642698           | 12695528                     |
| middle | r13 | ROS => p38                      | 1      | 1.3 | 0.55 | neonatal rat cardiac fibroblasts                      | activation                                           | 11597988 | neonatal rat cardiac fibroblasts | 24882408           | 12695528                     |
| middle | r14 | ROS => JNK                      | 1      | 1.3 | 0.55 | neonatal rat cardiac fibroblasts                      | activation                                           | 11597988 | neonatal rat cardiac fibroblasts | 12695528           |                              |
| middle | r15 | IL1R1 => NFKB                   | 1      | 1.3 | 0.55 | neonatal rat cardiac fibroblasts                      | release of blocking and increased abundance          | 11597988 | human foreskin fibroblasts       | 1906501            |                              |
| middle | r16 | gp130 => STAT                   | 1      | 1.3 | 0.55 | neonatal mouse fibroblasts                            | activation (via JAK)                                 | 19234091 | murine proB cell line            | 9874564            |                              |
| middle | r17 | TNFα => PI3K                    | 1      | 1.3 | 0.55 | human cardiac fibroblasts                             | activation                                           | 17560598 | human cardiac fibroblast         | 17612514           |                              |
| middle | r18 | !AT1R & !JNK & p38 => AGT       | 1      | 1.3 | 0.55 | neonatal rat cardiac fibroblasts                      | txn                                                  | 18926830 | neonatal rat cardiac fibroblasts | 21131638           | 11192370                     |
| middle | r19 | TGFβ1R & !PKG & !smad7 => smad3 | 1      | 1.3 | 0.55 | adult rat cardiac fibroblast                          | activation                                           | 17513491 | COS7 cells                       | 9335507, 9215638   | 17991884, 17038494           |
| output | r20 | smad3 & CBP & ERK => CTGF       | 1      | 1.3 | 0.55 | neonatal rat cardiac fibroblasts                      | txn                                                  | 18586263 | mouse cardiac fibroblasts        | 22749815           | 11013125, 12368229, 16959941 |
| output | r21 | STAT => proMMP2                 | 1      | 1.3 | 0.55 | neonatal rat cardiac fibroblasts                      | txn                                                  | 15550851 | human lung cell lines            | 24573038           |                              |
| output | r22 | STAT => proMMP9                 | 1      | 1.3 | 0.55 | mouse cardiac fibroblasts                             | txn                                                  | 19234091 | human genome database            | 18258475           |                              |
| output | r23 | smad3 & CBP => periostin        | 1      | 1.3 | 0.55 | adult rat cardiac fibroblasts                         | txn                                                  | 21367774 | gingival fibroblasts             | 24004653           |                              |
| output | r24 | CREB & CBP => periostin         | 1      | 1.3 | 0.55 | adult rat cardiac fibroblasts                         | txn                                                  | 21367774 | murine dermal fibroblast         | 24577408           | 16959941                     |
| middle | r25 | ERK => NFKB                     | 1      | 1.3 | 0.55 | human cardiac fibroblast                              | activation                                           | 17921324 | periodontal ligament fibroblast  | 21757573           |                              |
| middle | r26 | p38 => NFKB                     | 1      | 1.3 | 0.55 | human cardiac fibroblast                              | activation                                           | 17921324 | NIH-3T3 (via CBP)                | 11259436           |                              |
| output | r27 | NFKB & API & !smad3 => proMMP1  | 1      | 1.3 | 0.55 | human cardiac fibroblast                              | txn                                                  | 17921324 | human dermal fibroblasts         | 11502752           | 12525489                     |
| middle | r28 | ETAR => ROS                     | 1      | 1.3 | 0.55 | neonatal rat cardiac fibroblasts                      | activation                                           | 12695528 | neonatal rat cardiac fibroblasts | 16391241           |                              |
| middle | r29 | ERK => API                      | 1      | 1.3 | 0.55 | neonatal rat cardiac fibroblasts                      | activation                                           | 12695528 | human lung fibroblast            | 10862759           |                              |
| output | r30 | API => proMMP2                  | 1      | 1.3 | 0.55 | human cardiac fibroblasts                             | txn                                                  | 17921324 | neonatal rat cardiac fibroblasts | 12371906           |                              |
| output | r31 | API & NFKB => proMMP9           | 1      | 1.3 | 0.55 | human cardiac fibroblasts                             | txn                                                  | 17560598 | human foreskin fibroblasts       | 9755853            |                              |
| output | r32 | API => TIMP1                    | 1      | 1.3 | 0.55 | human cardiac fibroblasts                             | txn                                                  | 17921324 | human foreskin fibroblasts       | 9182725            |                              |
| output | r33 | API => TIMP2                    | 1      | 1.3 | 0.55 | human cardiac fibroblast                              | txn                                                  | 17921324 | 3T3 and rat fibroblast           | 8112602            |                              |
| middle | r34 | PKC & tension => B1int          | 1      | 1.3 | 0.55 | adult rat cardiac fibroblasts                         | activation                                           | 15949469 | mouse embryonic fibroblasts      | 12110574           | 21131638                     |
| middle | r35 | cAMP => PKA                     | 1      | 1.3 | 0.55 | adult rat cardiac fibroblasts                         | activation                                           | 11054474 | cardiac fibroblast               | 21977288           |                              |
| output | r36 | smad3 & CBP => fibronectin      | 1      | 1.3 | 0.55 | human lung fibroblast                                 | txn                                                  | 16707625 | human cardiac fibroblast         | 11013125           |                              |
| middle | r37 | !smad3 => CBP                   | 1      | 1.3 | 0.55 | adult rat cardiac fibroblasts                         | depletion of txn factor binding partner              | 16959941 | human dermal fibroblasts         | 10918613           |                              |
| middle | r38 | !CREB => CBP                    | 1      | 1.3 | 0.55 | adult rat cardiac fibroblasts                         | depletion of txn factor binding partner              | 16959941 | 3T3 cells                        | 8028671            |                              |
| middle | r39 | tension => B1int                | 1      | 1.3 | 0.55 | neonatal rat cardiac fibroblasts                      | activation                                           | 21131638 | NIH-3T3                          | 15760908           |                              |
| output | r40 | NFAT => EDAFN                   | 1      | 1.3 | 0.55 | neonatal mice cardiac fibroblast                      | txn activation                                       | 23178899 | rat cardiac fibroblasts          | 23142541           |                              |
| middle | r41 | TGFβ1R => ACE                   | 1      | 1.3 | 0.55 | rat cardiac fibroblasts                               | increased txn                                        | 11967821 | human cardiac myofibroblasts     | 18223028           |                              |
| middle | r42 | TGFβ & !BAMBI => TGFβ1R         | 1      | 1.3 | 0.55 | mice cardiac fibroblast                               | binding to receptor                                  | 22960625 | mouse cardiac fibroblasts        | 24078695           |                              |
| middle | r43 | API => proliferation            | 1      | 1.3 | 0.55 | adult rat cardiac fibroblasts                         | via activation of Kca3.1 channels                    | 23500546 | adult rat cardiac fibroblasts    | 17483238           |                              |
| middle | r44 | PKA => CREB                     | 1      | 1.3 | 0.55 | rat cardiac fibroblasts                               | activation                                           | 11054474 | mouse embryonic fibroblasts      | 11909979           |                              |
| middle | r45 | CREB => proliferation           | 1      | 1.3 | 0.55 | rat cardiac fibroblasts                               | activation                                           | 11054474 | rat cardiac fibroblasts          | 17483238           |                              |
| middle | r46 | NE => BAR                       | 1      | 1.3 | 0.55 | rat cardiac fibroblasts                               | receptor binding                                     | 11054474 | rat pineal gland                 | 7700241            |                              |
| middle | r47 | ET1 => ETAR                     | 1      | 1.3 | 0.55 | neonatal rat cardiac fibroblasts                      | receptor binding                                     | 12695528 | adult rat cardiac fibroblasts    | 8313418            |                              |
| middle | r48 | CTGF => proliferation           | 1      | 1.3 | 0.55 | human cardiac fibroblast                              | activation                                           | 11013125 | rat cardiac fibroblasts          | 17483238           |                              |
| middle | r49 | IL1 => IL1R1                    | 1      | 1.3 | 0.55 | mouse cell line                                       | receptor binding                                     | 8327496  | neonatal rat cardiac fibroblasts | 7769098            |                              |
| middle | r50 | PKC => proliferation            | 1      | 1.3 | 0.55 | adult rat cardiac fibroblasts                         | activation                                           | 10756114 | adult rat cardiac fibroblasts    | 17483238           |                              |
| output | r51 | smad3 & CBP & !epac => proCI    | 1      | 1.3 | 0.55 | adult rat cardiac fibroblasts                         | txn                                                  | 17513491 | adult rat cardiac fibroblasts    | 17513491           | 11279127, 18434542, 23845590 |
| output | r52 | smad3 & CBP & !epac => proCHI   | 1      | 1.3 | 0.55 | adult rat cardiac fibroblasts                         | txn                                                  | 17513491 | adult rat cardiac fibroblasts    | 17513491           | 11279127, 18434542, 23845590 |
| output | r53 | API => proMMP14                 | 1      | 1.3 | 0.55 | mouse cardiac fibroblasts                             | correlated increase with cFOS                        | 22287584 | mouse embryonic fibroblasts      | 17348021           |                              |
| middle | r54 | PDGF => PDGFR                   | 1      | 1.3 | 0.55 | adult rat cardiac fibroblasts                         | receptor binding                                     | 11230972 | rat cardiac fibroblasts          | 24427322           |                              |
| middle | r55 | BAR => AC                       | 1      | 1.3 | 0.55 | adult rat cardiac fibroblasts                         | activation                                           | 12711600 | rat cardiac fibroblasts          | 17934720           |                              |
| middle | r56 | BAR & AT1R => AC                | 1      | 1.3 | 0.55 | adult rat cardiac fibroblasts                         | activation with potentiation                         | 12711600 | rat dermal fibroblasts           | 1330500            |                              |
| middle | r57 | AC => cAMP                      | 1      | 1.3 | 0.55 | adult rat cardiac fibroblasts                         | activation                                           | 12711600 | human pulmonary fibroblast       | 15075208           |                              |
| middle | r58 | FAK => MEKK1                    | 1      | 1.3 | 0.55 | mouse embryonic fibroblasts                           | activation                                           | 17409352 | mouse embryonic fibroblasts      | 12458213           | 21131638                     |
| output | r59 | API => latentTGFβ               | 1      | 1.3 | 0.55 | mouse lung fibroblasts                                | txn activation                                       | 20141610 | adult rat cardiac fibroblasts    | 21367774           | 22429882, 19374881           |
| middle | r60 | cAMP => epac                    | 1      | 1.3 | 0.55 | adult rat cardiac fibroblasts                         | activation                                           | 18434542 | NIH-3T3                          | 9853756            |                              |
| middle | r61 | Rho => ROCK                     | 1      | 1.3 | 0.55 | rat embryonic fibroblasts                             | activation                                           | 16043513 | rat cardiac fibroblasts          | 17456553           |                              |
| middle | r62 | TNFα => TNFαR                   | 1      | 1.3 | 0.55 | human cardiac fibroblast                              | receptor binding                                     | 17560598 | mouse cardiac fibroblasts        | 23337087           |                              |
| middle | r63 | NP => NPRA                      | 1      | 1.3 | 0.55 | human cardiac fibroblast                              | receptor binding                                     | 16986166 | COS7 cells                       | 11595171           |                              |
| middle | r64 | NPRA => cGMP                    | 1      | 1.3 | 0.55 | adult rat cardiac fibroblast                          | activation                                           | 17991884 | human cardiac fibroblast         | 16986166           |                              |
| middle | r65 | cGMP => PKG                     | 1      | 1.3 | 0.55 | adult rat cardiac fibroblast                          | activation                                           | 17991884 | mouse cardiac fibroblasts        | 21282499           |                              |
| middle | r66 | Ras => Raf                      | 1      | 1.3 | 0.55 | neonatal rat cardiac fibroblast                       | possibly via recruitment and Src phosphorylation     | 9486662  | NIH-3T3                          | 8668210            |                              |
| middle | r67 | Raf & !ERK => MEK1              | 1      | 1.3 | 0.55 | adult rat cardiac fibroblast                          | activation                                           | 12388314 | NIH-3T3                          | 8668210            | 21943356, 24489118           |
| middle | r68 | MEK1 & !PP1 => ERK              | 1      | 1.3 | 0.55 | adult rat cardiac fibroblast                          | activation                                           | 12388314 | NIH-3T3                          | 12167697           | 11259586, 15972258,          |
| middle | r69 | p38 => PP1                      | 1      | 1.3 | 0.55 | 3T3 cells, adult and neonatal human dermal fibroblast | via activation                                       | 11259586 | human endothelial cells          | 15972258           | 25659900                     |
| middle | r70 | MKK3 => p38                     | 1      | 1.3 | 0.55 | 3T3 cells, adult and neonatal human dermal fibroblast | activation                                           | 11259586 | human synovioctes                | 15778394           |                              |
| middle | r71 | TGFβ1R => TRAF                  | 1      | 1.3 | 0.55 | adult mouse cardiac fibroblast                        | activation                                           | 22749815 | mouse embryonic fibroblasts      | 18922473           |                              |
| middle | r72 | Rac1 => MEKK1                   | 1      | 1.3 | 0.55 | NIH-3T3, HeLa                                         | activation                                           | 7600582  | ovarian cancer cells             | 9674706            |                              |
| middle | r73 | MEKK1 => MKK4                   | 1      | 1.3 | 0.55 | NIH-3T3, HeLa                                         | activation                                           | 7600582  | cos1, HeLa                       | 12401521           |                              |
| middle | r74 | MKK4 & !NFKB => JNK             | 1      | 1.3 | 0.55 | NIH-3T3, HeLa                                         | activation                                           | 7600582  | NIH-3T3                          | 16076903           | 11713530, 11466617           |

|        |      |                                     |   |     |      |                                       |                                                                 |          |                                        |          |          |
|--------|------|-------------------------------------|---|-----|------|---------------------------------------|-----------------------------------------------------------------|----------|----------------------------------------|----------|----------|
| middle | r75  | PDGFR => abl                        | 1 | 1.3 | 0.55 | 3T3                                   | activation                                                      | 16076903 | mouse embryonic fibroblasts            | 10500097 |          |
| middle | r76  | abl => Rac1                         | 1 | 1.3 | 0.55 | 3T3                                   | activation                                                      | 16076903 | mouse embryonic fibroblasts            | 15039778 |          |
| middle | r77  | JNK => cmyc                         | 1 | 1.3 | 0.55 | 3T3                                   | activation                                                      | 16076903 | NIH-3T3                                | 14523011 |          |
| middle | r78  | cmyc => proliferation               | 1 | 1.3 | 0.55 | 3T3                                   | activation                                                      | 16076903 | NIH-3T3                                | 15195135 |          |
| middle | r79  | TNFA => TRAF                        | 1 | 1.3 | 0.55 | 293 cells                             | activation                                                      | 9774977  | human cardiac fibroblast               | 17560598 | 10523862 |
| middle | r80  | TRAF => ASK1                        | 1 | 1.3 | 0.55 | 293 cells                             | activation - most likely binding allows the receptor to eventua | 9774977  | 293, cos7, mouse embryonic fibroblas   | 10523862 |          |
| middle | r81  | ASK1 => MKK3                        | 1 | 1.3 | 0.55 | COS7 cells                            | activation                                                      | 8974401  | human foreskin fibroblasts             | 10912795 |          |
| middle | r82  | ASK1 => MKK4                        | 1 | 1.3 | 0.55 | COS7 cells                            | activation                                                      | 8974401  | human embryonic lung fibroblasts       | 19494316 | 9774977  |
| middle | r83  | IL1R1 => ASK1                       | 1 | 1.3 | 0.55 | fibroblast-like synoviocytes          | assumed activation                                              | 15778394 | human foreskin fibroblasts             | 10912795 |          |
| middle | r84  | smad3 => PAI1                       | 1 | 1.3 | 0.55 | adult mouse cardiac fibroblast        | transcription                                                   | 17991884 | Hep2g cells                            | 9606191  | 11279127 |
| output | r85  | NFKB => proMMP14                    | 1 | 1.3 | 0.55 | human dermal fibroblast               | transcription                                                   | 11112697 | human breast cancer cell line          | 20855151 |          |
| middle | r86  | Ras => p38                          | 1 | 1.3 | 0.55 | adult rat cardiac fibroblast          | unknown                                                         | 21367774 | human foreskin fibroblasts             | 14593117 |          |
| middle | r87  | TGFB1R => PI3K                      | 1 | 1.3 | 0.55 | adult rat cardiac fibroblast          | activation                                                      | 21498085 | NIH-3T3                                | 16288034 |          |
| middle | r88  | PDGFR => PI3K                       | 1 | 1.3 | 0.55 | 3T3                                   | activation                                                      | 21943356 | adult rat cardiac fibroblasts          | 11230972 |          |
| middle | r89  | FAK => PI3K                         | 1 | 1.3 | 0.55 | human lung fibroblast                 | activation                                                      | 15166238 | human bone marrow mesenchymal ste      | 25900259 |          |
| middle | r90  | TGFB1R => NOX                       | 1 | 1.3 | 0.55 | human cardiac fibroblast              | activation                                                      | 16179589 | human dermal fibroblasts               | 26096997 | 25858818 |
| middle | r91  | Akt => NFKB                         | 1 | 1.3 | 0.55 | human cardiac fibroblast              | activation by removal of IKK                                    | 18064631 | human dermal fibroblasts, rat synovio  | 10485711 |          |
| output | r92  | NFKB => fibronectin                 | 1 | 1.3 | 0.55 | human cardiac fibroblast              | transcription                                                   | 18064631 | rat osteoblasts                        | 17252537 | 23141425 |
| middle | r93  | JNK => AP1                          | 1 | 1.3 | 0.55 | human periodontal ligament fibroblast | activation                                                      | 21757573 | neonatal rat cardiac fibroblasts       | 12695528 |          |
| middle | r94  | IL1R1 & TGFB => BAMBI               | 1 | 1.3 | 0.55 | mice cardiac fibroblast               | increased transcription (unsure of transcription factor)        | 24078695 | adult rat cardiac fibroblasts          | 23734837 |          |
| middle | r95  | Forskolin => AC                     | 1 | 1.3 | 0.55 | adult rat cardiac fibroblast          | drug action                                                     | 12711600 | human lung fibroblast                  | 15075208 |          |
| middle | r96  | STAT => smad7                       | 1 | 1.3 | 0.55 | U4A cell line                         | STAT necessary for smad expression                              | 10067896 | human lung fibroblast                  | 11927620 | 22751114 |
| output | r97  | SRF => proCI                        | 1 | 1.3 | 0.55 | 10t1/2 cells, cardiac fibroblasts     | MRTF directly activates the expression of COL1                  | 20558820 | NIH-3T3, mouse embryonic fibroblast    | 24732378 |          |
| middle | r98  | Rho & !Rac1 => p38                  | 1 | 1.3 | 0.55 | neonatal rat cardiac fibroblast       |                                                                 | 21131638 | murine mesangial cells                 | 25007875 |          |
| middle | r99  | MKK4 & !Rho => JNK                  | 1 | 1.3 | 0.55 | neonatal rat cardiac fibroblast       |                                                                 | 21131638 | NIH-3T3                                | 7600582  |          |
| output | r100 | SRF => proCIII                      | 1 | 1.3 | 0.55 | mouse cardiac fibroblasts             |                                                                 | 20558820 | NIH-3T3, mouse embryonic fibroblast    | 24732378 |          |
| output | r101 | SRF & smad3 & CBP => aSMA           | 0 | 1.3 | 0.55 | human cardiac fibroblast              |                                                                 | 16179589 | mouse embryonic fibroblasts            | 20558820 | 24732378 |
| middle | r102 | calcineurin => NFAT                 | 1 | 1.3 | 0.55 | mouse cardiac fibroblasts             | activation/nuclear translocation                                | 22403241 | neonatal mouse cardiac fibroblast      | 23178899 |          |
| middle | r103 | AT1R => Ras                         | 1 | 1.3 | 0.55 | neonatal cardiac fibroblasts          |                                                                 | 9486662  | adult rat cardiac fibroblasts          | 21367774 |          |
| output | r104 | smad3 & CBP => aSMA                 | 1 | 1.3 | 0.55 | human cardiac fibroblast              | txn activation                                                  | 16179589 | rat gingival fibroblasts               | 26738448 |          |
| output | r105 | SRF => aSMA                         | 1 | 1.3 | 0.55 | rat cardiac fibroblasts               | transcription                                                   | 17456553 | mouse embryonic fibroblasts            | 15855636 |          |
| middle | r106 | ETAR => DAG                         | 1 | 1.3 | 0.55 | rat embryonic fibroblasts             | production                                                      | 1809396  | mouse embryonic fibroblasts            | 10676846 |          |
| middle | r107 | AT1R => DAG                         | 1 | 1.3 | 0.55 | CHO cells                             | production                                                      | 7653525  | rat cardiac fibroblasts                | 17982962 |          |
| middle | r108 | DAG => TRPC                         | 1 | 1.3 | 0.55 | human cardiac fibroblast              | activation                                                      | 17533154 | adult rat cardiac fibroblasts          | 22992321 | 25521631 |
| middle | r109 | TRPC & tension => Ca                | 1 | 1.3 | 0.55 | human cardiac fibroblast              | channel opening                                                 | 23827314 | adult rat cardiac fibroblasts          | 22992321 |          |
| middle | r110 | Ca => calcineurin                   | 1 | 1.3 | 0.55 | adult rat cardiac fibroblast          | activation                                                      | 26191219 | rat dermal fibroblasts                 | 23022034 |          |
| middle | r111 | TGFB1R => Rho                       | 1 | 1.3 | 0.55 | human gingival fibroblasts            |                                                                 | 16953819 | human colonic fibroblasts              | 24280883 | 29700112 |
| middle | r112 | B3int => Src                        | 1 | 1.3 | 0.55 | human lung fibroblasts                | dephosphorylation: Y530, autophosphorylation: Y419              | 18353785 | CHO cells                              | 14593208 |          |
| middle | r113 | B1int => FAK                        | 1 | 1.3 | 0.55 | mouse embryonic fibroblasts, COS7     | autophosphorylation: Y397                                       | 7529876  | mouse embryonic fibroblasts            | 10413676 | 23589296 |
| middle | r114 | FAK & Src => Grb2                   | 1 | 1.3 | 0.55 | mouse embryonic fibroblasts           | activation via Src                                              | 7997267  | mouse embryonic fibroblasts            | 9032297  | 8816475  |
| middle | r115 | Grb2 => Ras                         | 1 | 1.3 | 0.55 | rat cardiac fibroblasts               | activation via SOS                                              | 9486662  | mouse embryonic fibroblasts, HEK293    | 8479541  | 7997267  |
| middle | r116 | FAK & Src => RhoGEF                 | 1 | 1.3 | 0.55 | mouse embryonic fibroblasts           | activation                                                      | 18195107 | mouse embryonic fibroblasts            | 18303050 | 19339545 |
| middle | r117 | !Src => RhoGDI                      | 1 | 1.3 | 0.55 | mouse embryonic fibroblasts, HeLa     | phosphorylation: decreases binding Rho binding affinity         | 16943322 | 293T                                   | 19321744 |          |
| middle | r118 | FAK & Src => p130Cas                | 1 | 1.3 | 0.55 | mouse embryonic fibroblasts           | activation via Src                                              | 9032297  | CHO cells                              | 9425168  | 16581250 |
| middle | r119 | PDGFR => Src                        | 1 | 1.3 | 0.55 | mouse embryonic fibroblasts           | activation                                                      | 8356071  | mouse embryonic fibroblasts            | 10222144 | 9739761  |
| middle | r120 | tension & Src => p130Cas            | 1 | 1.3 | 0.55 | mouse embryonic fibroblasts           | activation                                                      | 8670206  | mouse embryonic fibroblasts            | 22499769 | 17129785 |
| middle | r121 | p130Cas & abl => Rac1               | 1 | 1.3 | 0.55 | HEK293                                | activation                                                      | 10385525 | 293T                                   | 18793427 | 17533370 |
| middle | r122 | Factin => YAP                       | 1 | 1.3 | 0.55 | mouse embryonic fibroblasts           | nuclear translocation                                           | 23644383 | mouse embryonic fibroblasts            | 26757814 | 24648494 |
| middle | r123 | PKA => RhoGDI                       | 1 | 1.3 | 0.55 | rat cardiac fibroblasts               | phosphorylation                                                 | 23012358 | COS7 cells                             | 18768928 |          |
| middle | r124 | RhoGEF & !RhoGDI => Rho             | 1 | 1.3 | 0.55 | mouse embryonic fibroblasts           | activation                                                      | 18303050 | mouse embryonic fibroblasts            | 22649559 | 24467208 |
| output | r125 | YAP => CTGF                         | 1 | 1.3 | 0.55 | mouse embryonic fibroblasts           | txn via TEAD                                                    | 18579750 | MCF10A                                 | 19324877 | 29563341 |
| middle | r126 | syndecan4 => PKC                    | 1 | 1.3 | 0.55 | rat embryonic fibroblasts             | activation                                                      | 22504297 | rat embryonic fibroblasts              | 12571249 | 16787950 |
| middle | r127 | !PKC => RhoGDI                      | 1 | 1.3 | 0.55 | rat embryonic cardiomyocytes          | phosphorylation                                                 | 15316932 | human umbilical vein endothelial cells | 11309397 |          |
| middle | r128 | !Gactin & NFAT => MRTF              | 0 | 1.3 | 0.55 | mouse cardiac fibroblasts             | translocation                                                   | 23178899 | mouse dermal fibroblasts               | 23022034 |          |
| middle | r129 | !Gactin & Hic5 => MRTF              | 1 | 1.3 | 0.55 | mouse embryonic fibroblasts           | translocation                                                   | 18025109 | mouse embryonic fibroblasts            | 12475943 | 12475943 |
| middle | r130 | ROCK & Gactin => Factin             | 1 | 1.3 | 0.55 | rat cardiac fibroblasts               | polymerization                                                  | 17456553 | mouse embryonic fibroblasts            | 12732141 | 26721596 |
| middle | r131 | !Factin => Gactin                   | 1 | 1.3 | 0.55 | mouse embryonic fibroblasts           | polymerization                                                  | 12475943 | mouse embryonic fibroblasts            | 12732141 |          |
| middle | r132 | MRTF => SRF                         | 1 | 1.3 | 0.55 | human lung fibroblasts                |                                                                 | 22461426 | mouse embryonic fibroblasts            | 12732141 | 26721596 |
| fback  | r133 | !TNC & tension => syndecan4         | 1 | 1.3 | 0.55 | mouse dermal fibroblasts              | dephosphorylation                                               | 15483051 | T98G                                   | 11731446 | 19339214 |
| middle | r134 | Akt => mTORC1                       | 1 | 1.3 | 0.55 | HEK293                                | activation via TSC1/2, PRAS40 inhibition                        | 12172553 | mouse embryonic fibroblasts            | 16027121 | 19117990 |
| middle | r135 | mTORC1 => p70S6K                    | 1 | 1.3 | 0.55 | mouse embryonic fibroblasts           | activation                                                      | 21602892 | mouse embryonic fibroblasts            | 16027121 | 19117990 |
| middle | r136 | !mTORC1 => EBP1                     | 1 | 1.3 | 0.55 | mouse embryonic fibroblasts           | phosphorylation                                                 | 23940704 | HEK293                                 | 9465032  | 29518028 |
| middle | r137 | !EBP1 & p70S6K => proliferation     | 1 | 1.3 | 0.55 | rat cardiac fibroblasts               | mRNA translation                                                | 16270752 | human lung fibroblasts                 | 21784851 | 15522879 |
| middle | r138 | Akt => smad3                        | 1 | 1.3 | 0.55 | mouse cardiac fibroblasts             | activation via GSK3B inhibition                                 | 24899689 | mouse embryonic fibroblasts            | 19458083 | 17604717 |
| output | r139 | NFKB => TNC                         | 1 | 1.3 | 0.55 | human cardiac fibroblasts             | txn                                                             | 23454256 | chick embryonic fibroblasts            | 15363633 | 20107185 |
| output | r140 | MRTF => TNC                         | 1 | 1.3 | 0.55 | mouse embryonic fibroblasts           | txn                                                             | 21705668 | chick embryonic fibroblasts            | 15363633 |          |
| middle | r141 | !p70S6K => mTORC2                   | 1 | 1.3 | 0.55 | mouse embryonic fibroblasts           | phosphorylation via Rictor                                      | 19995915 | HEK293                                 | 19720745 |          |
| middle | r142 | mTORC2 & PI3K => Akt                | 1 | 1.3 | 0.55 | mouse embryonic fibroblasts           | activation                                                      | 23311350 | mouse embryonic fibroblasts            | 18566587 | 15718470 |
| middle | r143 | mTORC2 & DAG => PKC                 | 1 | 1.3 | 0.55 | HEK293                                | activation                                                      | 15268862 | mouse embryonic fibroblasts            | 18566587 | 17604717 |
| output | r144 | YAP => PAI1                         | 1 | 1.3 | 0.55 | human lung fibroblasts                | txn                                                             | 25502501 | mouse embryonic fibroblasts            | 27881410 |          |
| middle | r145 | smad3 => thrombospondin4            | 1 | 1.3 | 0.55 | human dermal fibroblasts              | txn                                                             | 30132849 | mouse lung endothelial cells           | 28481870 |          |
| fback  | r146 | !thrombospondin4 & tension => B3int | 1 | 1.3 | 0.55 | mouse cardiac fibroblasts             | receptor binding                                                | 25987545 | human ligament fibroblasts             | 19647831 | 20884877 |
| output | r147 | NFKB & AP1 & !smad3 => proMMP8      | 1 | 1.3 | 0.55 | mouse cardiac fibroblasts             | txn                                                             | 30686120 | human mesenchymal stem cells           | 24738865 | 19805288 |
| output | r148 | NFKB & AP1 & !smad3 => proMMP3      | 1 | 1.3 | 0.55 | mouse cardiac fibroblasts             | txn                                                             | 30686120 | human cardiac fibroblasts              | 20619343 | 17706606 |
| output | r149 | AP1 => osteopontin                  | 1 | 1.3 | 0.55 | rat cardiac fibroblasts               | txn                                                             | 14755545 | rat lung fibroblasts                   | 16211580 |          |
| fback  | r150 | osteopontin => B3int                | 1 | 1.3 | 0.55 | rat cardiac fibroblasts               | receptor binding                                                | 8941637  | human lung fibroblasts                 | 16128620 |          |
| output | r151 | CREB => proMMP12                    | 1 | 1.3 | 0.55 | human dermal fibroblasts              | txn                                                             | 23671273 |                                        |          |          |
| middle | r152 | AP1 & !YAP => smad7                 | 1 | 1.3 | 0.55 | human dermal fibroblasts              | txn: YAP/TAZ knock-down required for smad7 expression           | 29695252 | mouse embryonic fibroblasts            | 11402315 | 10843994 |
| middle | r153 | FAK & Src & MLC => paxillin         | 1 | 1.3 | 0.55 | human foreskin fibroblasts            | activation                                                      | 20308429 | mouse embryonic fibroblasts, PAEC      | 17164291 |          |
| middle | r154 | vinculin & !paxillin => FA          | 1 | 1.3 | 0.55 | human foreskin fibroblasts            | stabilization: paxillin increases FA turnover for increased mig | 18056416 | mouse embryonic fibroblasts, PAEC      | 17164291 |          |
| middle | r155 | B1int => talin                      | 1 | 1.3 | 0.55 | mouse embryonic fibroblasts           | activation                                                      | 18056416 | mouse embryonic fibroblasts            | 27065098 |          |
| middle | r156 | B3int => talin                      | 1 | 1.3 | 0.55 | mouse embryonic fibroblasts           | activation                                                      | 27065098 | mouse fibroblast-like cells            | 14581461 |          |
| middle | r157 | talin & contractility => vinculin   | 1 | 1.3 | 0.55 | mouse embryonic fibroblasts           | activation                                                      | 18056416 | mouse embryonic fibroblasts            | 27065098 |          |
| middle | r158 | Factin & MLC => contractility       | 1 | 1.3 | 0.55 | mouse embryonic fibroblasts           | binding via vinculin tail region                                | 18056416 | mouse embryonic fibroblasts            | 23716647 |          |
| fback  | r159 | contractility & FA => tension       | 1 | 1.3 | 0.55 | human foreskin fibroblasts            | force generation via molecular clutch theory                    | 28592635 | human foreskin fibroblasts             | 2859772  | 26121555 |
| middle | r160 | ROCK => MLC                         | 1 | 1.3 | 0.55 | mouse embryonic fibroblasts           | activation via MLCK activation, MBS inhibition                  | 10953004 | rat embryonic fibroblasts              | 16043513 |          |

|        |      |                              |      |     |      |                                   |                                                                |                 |                                          |          |                         |               |
|--------|------|------------------------------|------|-----|------|-----------------------------------|----------------------------------------------------------------|-----------------|------------------------------------------|----------|-------------------------|---------------|
| middle | r161 | Cilia => PKD1                | 1    | 1.3 | 0.55 | mouse embryonic kidney cells      | direct co-localization in WT at basal body and ciliary tubulin | 12514735        | mouse kidney epithelium                  | 12239239 |                         |               |
| middle | r162 | Cilia => PKD2                | 1    | 1.3 | 0.55 | mouse kidney cells                | direct co-localization in WT at basal body and ciliary tubulin | 12062067        | mouse embryonic kidney cells             | 12514735 |                         |               |
| middle | r163 | Cilia & tension => PKD1      | 1    | 1.3 | 0.55 | VSMCs                             | PKD1 needed for response to inc pressure                       | 19879844        | chondrocytes (cyclic)                    | 22223751 |                         |               |
| middle | r164 | PKD1 => PKD2                 | 1    | 1.3 | 0.55 | mouse embryonic kidney cells      | direct co-localization in WT at basal body and ciliary tubulin | 12514735        | COS cells, kidney epithelium, aortic ept | 19879844 |                         |               |
| middle | r165 | PKD2 => TRPV4                | 1    | 1.3 | 0.55 | mouse endothelial cells           | tension = shear stress                                         | 19265036        | kidney epithelial cells                  | 12514735 | 18695040                | keratinocytes |
| middle | r166 | PKD2 & tension => NOX        | 1    | 1.3 | 0.55 | mouse endothelial cells           | tension = shear stress                                         | 19265036        | primary osteocytes                       | 24268313 |                         |               |
| middle | r167 | TRPV4 & tension => Ca        | 1    | 1.3 | 0.55 | pulmonary adventitial fibroblasts |                                                                | 31693393        | pulmonary fibroblasts                    | 29126921 |                         |               |
| middle | r168 | PKD1 & B1int => FAK          | 1    | 1.3 | 0.55 | medullary collecting duct cells   | co-ip and activation when plated on fibronectin                | 16790429        | MDCk cells                               | 25947155 |                         |               |
| middle | r169 | PKD2 => IP3R                 | 1    | 1.3 | 0.55 | Xenopus cells                     |                                                                | 16223735        | human kidney epithelium                  | 22456092 |                         |               |
| middle | r170 | PKD2 & IP3R => Ca            | 1    | 1.3 | 0.55 | Xenopus cells                     |                                                                | 16223735        | human kidney epithelium                  | 22456092 |                         |               |
| middle | r171 | Cilia => DZIP1               | 1    | 1.3 | 0.55 | valve interstitial cell           | co-immunoprecipitation                                         | 31118289        | mouse embryonic fibroblasts              | 23955340 |                         |               |
| middle | r172 | DZIP1 => CBV1                | 1    | 1.3 | 0.55 | valve interstitial cell           | co-immunoprecipitation                                         | Guo et al. 2020 | confirmed with yeast 2-hybrid screen     |          |                         |               |
| middle | r173 | ICB1 => Bcatenin             | 1    | 1.3 | 0.55 | valve interstitial cell           | cby1 knockdown leads to increased nuclear B-catenin            | Guo et al. 2020 | mouse respiratory epithelium             | 19364920 | 12712206                | 18573912      |
| input  | i12  | => DHH                       | 0.1  | 1.3 | 0.55 |                                   | increased during cardiac development                           | 32151560        |                                          |          |                         |               |
| middle | r174 | Cilia & DHH & IPtch1 => SMO  | 1    | 1.3 | 0.55 | valve interstitial cell           |                                                                | 28556366        | valve interstitial cell                  | 32151560 | 17641202                | 22474285      |
| middle | r175 | SMO => TIAM1                 | 1    | 1.3 | 0.55 | valve interstitial cell           |                                                                | 32151560        | mouse embryonic fibroblasts, pyramida    | 20654717 |                         |               |
| middle | r176 | TIAM1 => Rac1                | 1    | 1.3 | 0.55 | valve interstitial cell           |                                                                | 32151560        | human dermal fibroblasts                 | 20802514 |                         |               |
| middle | r177 | Cilia & PDGF => PDGFR        | 0.25 | 1.3 | 0.55 | MEFs                              |                                                                | 20110689        | NIH3T3 cells                             | 16243034 |                         |               |
| input  | i13  | => WNT                       | 0.1  | 1.3 | 0.55 |                                   | increased during cardiac development and matrix production     | 22819513        |                                          |          |                         |               |
| middle | r178 | Cilia & TGFB => TGFB1R       | 0.25 | 1.3 | 0.55 | mouse embryonic fibroblasts       | dec cilia => dec receptor function                             | 23746451        | mesenchymal stem cells                   | 27748449 |                         |               |
| fback  | r179 | periostin => B1int           | 1    | 1.3 | 0.55 | valve interstitial cell           |                                                                | 30742951        | valve interstitial cell                  | 24469446 |                         |               |
| middle | r180 | Akt => Pak1                  | 1    | 1.3 | 0.55 | valve interstitial cell           |                                                                | 30742951        | valve interstitial cell                  | 24469446 |                         |               |
| fback  | r181 | periostin => B3int           | 1    | 1.3 | 0.55 | valve interstitial cell           |                                                                | 24469446        | valve interstitial cell                  | 30742951 |                         |               |
| middle | r182 | Flna & tension => B1int      | 1    | 1.3 | 0.55 | HEK293                            | FLNA binds to cytoplasmic tail of B1int                        | 18177638        | T cells                                  | 9722563  |                         |               |
| middle | r183 | Rac1 => Pak1                 | 1    | 1.3 | 0.55 | Human 293T cells                  | rac1 needed for activation of Pak1 at membrane                 | 11804587        | Fibroblasts                              | 11134074 |                         |               |
| middle | r184 | Pak1 => ERK                  | 1    | 1.3 | 0.55 | valve interstitial cell           |                                                                | 24469446        | mouse medullary collecting duct cells    | 23781022 |                         |               |
| middle | r185 | Pak1 => Flna                 | 1    | 1.3 | 0.55 | 3T3 fibroblasts                   | co-immunoprecipitation                                         | 32389644        | MCF-7 cells                              | 12198493 |                         |               |
| middle | r186 | FAK => Hic5                  | 1    | 1.3 | 0.55 | 293T cells                        |                                                                | 9858471         | rat fibroblast (WFB)                     | 9422762  |                         |               |
| middle | r187 | SMO => Gli2                  | 1    | 1.3 | 0.55 | Valve interstitial cell           |                                                                | 32151560        | vascular adventitial fibroblasts         | 29088375 |                         |               |
| middle | r188 | Gli2 => Runx2                | 1    | 1.3 | 0.55 | osteoblast                        |                                                                | 17442891        | mouse fetal cardiac cells                | 18813803 |                         |               |
| middle | r189 | Runx2 => ADAMTS5             | 1    | 1.3 | 0.55 | chondrocytes                      |                                                                | 21094261        | synovial fibroblasts                     | 27449198 |                         |               |
| middle | r190 | Runx2 => ADAMTS4             | 1    | 1.3 | 0.55 | Chondrocytes                      |                                                                | 21094261        | synovial fibroblasts                     | 27449198 |                         |               |
| middle | r191 | Runx2 => ADAMTS9             | 1    | 1.3 | 0.55 | chondrocytes                      |                                                                | 21094261        | synovial fibroblasts                     | 27449198 |                         |               |
| middle | r192 | Runx2 => proMMP13            | 1    | 1.3 | 0.55 | chondrocytes                      |                                                                | 21094261        | chondrocytes                             | 16868966 |                         |               |
| middle | r193 | !tension => Cilia            | 1    | 1.3 | 0.55 | tenocytes                         | cyclic stress lead => cilia length                             | 20957738        | chondrocytes (cyclic)                    | 24457103 | human endothelial cells | 15024030      |
| middle | r194 | Cilia & Gactin => Factin     | 0.25 | 1.3 | 0.55 | chondrocytes                      | cilia loss is associated with decreased F-actin organization   | 26493329        | chondrocytes                             | 17359961 |                         |               |
| middle | r195 | WNT & Cilia => Fz            | 1    | 1.3 | 0.55 | mouse cardiac fibroblasts         |                                                                | 30040870        | conserved across species and cell types  | 19147006 |                         |               |
| middle | r196 | Fz => Dvl                    | 1    | 1.3 | 0.55 | mouse cardiac fibroblasts         |                                                                | 30040870        | conserved across species and cell types  | 19147006 |                         |               |
| middle | r197 | !Dvl => GSK3B                | 1    | 1.3 | 0.55 | mouse cardiac fibroblasts         |                                                                | 30040870        | conserved across species and cell types  | 19147006 |                         |               |
| middle | r198 | !GSK3B => Bcatenin           | 1    | 1.3 | 0.55 | mouse cardiac fibroblasts         |                                                                | 30040870        | conserved across species and cell types  | 19147006 |                         |               |
| middle | r199 | !Bcatenin => Groucho         | 1    | 1.3 | 0.55 | mouse cardiac fibroblasts         |                                                                | 30040870        | conserved across species and cell types  | 19147006 |                         |               |
| middle | r200 | !Groucho => TCF              | 1    | 1.3 | 0.55 | mouse cardiac fibroblasts         |                                                                | 30040870        | conserved across species and cell types  | 19147006 |                         |               |
| middle | r201 | !Cilia => Bcatenin           | 1    | 1.3 | 0.55 | MEFs                              |                                                                | 18084282        | MEFs                                     | 21602792 |                         |               |
| middle | r202 | Rac1 & smad3 => NOX          | 1    | 1.3 | 0.55 | NIH-3T3                           | Rac activates Nox                                              | 8809022         | VSMC                                     | 16514078 |                         |               |
| middle | r203 | NOX => MLC                   | 1    | 1.3 | 0.55 | mouse myofibroblasts              |                                                                | 24403605        | lung VSMC                                | 18621909 |                         |               |
| middle | r204 | Bcatenin & MRTF => SRF       | 1    | 1.3 | 0.55 | LLC-PK1 cells                     | potentially through a de-repressor action                      | 21965288        | MCF-7 cells                              | 29632640 |                         |               |
| middle | r205 | TCF => fibronectin           | 1    | 1.3 | 0.55 | mouse lung fibroblasts            |                                                                | 15617677        | embryonic stem cells                     | 18983966 |                         |               |
| middle | r206 | TCF => versican              | 1    | 1.3 | 0.55 | VSMCs                             |                                                                | 15668231        | human melanoma cells                     | 19269971 |                         |               |
| middle | r207 | aSMA & MLC => contractility  | 1    | 1.3 | 0.55 | mouse myofibroblasts              |                                                                | 19800625        | rat lung fibroblasts                     | 18086923 |                         |               |
| fback  | r208 | tension & latentTGFB => TGFB | 0.25 | 1.3 | 0.55 | rat lung fibroblasts              | contraction & stretch can release active TGFB from LBP         | 18086923        | HCC cells                                | 28025149 |                         |               |

### **Supplemental Figure Legends:**

**Figure S1: Regional fibrosis in MVP patients.** (A) Patient age and leaflet involvement are listed. (B) Masson's histochemical stain at low magnification showing entire biopsy region and prominent fibrosis (blue) in peri-papillary region compared to within-person tissues from either apex or septum. (C) Same patient biopsies immunostained for collagen I (black). Scale bars = 1mm.

**Figure S2: Evidence of sarcomeric loss in myocytes.** Biopsy from MVr patient shows well elaborated myocytes (purple) with definable sarcomeric organization and no detectable fibrosis within the apex region. Within the same patient, prominent fibrosis and sarcomeric disorganization/loss (arrows) are prominent within fibrotic (collagen-yellow) zones in peri-papillary regions. Scale bars are 50 $\mu$ m.

**Figure S3: Regional fibrosis correlates with increased macrophages in MVP.** Septal (top) and peri-papillary biopsies were obtained from the same patient during MVr and IHC was performed for collagen (yellow), CD163 (purple) and nuclei (Hoechst-blue). Uniquely within the peri-papillary region, prominent fibrosis and CD163<sup>+</sup> macrophages are observed.

**Figure S4: Full network of all input nodes used in computational modeling.** Interconnections between all nodes from >300 publications of cardiac fibroblast molecular and mechanobiology were interpolated.

**Figure S5: Heat map of all significant differentially expressed genes.** 232 statistically significant differentially expressed genes between stretched and static human cardiac fibroblasts are represented.

### **Supplemental Video Legends:**

**Video S1: 2D TEE echocardiography showing prominent posterior leaflet prolapse**

**Video S2: 3D TEE echocardiography showing prominent posterior leaflet prolapse**



**Video S3 and S4: Cardiac MRI with late gadolinium enhancement showing evidence of peri-papillary and inferobasal myocardial fibrosis**

**Video S5: Mitral valve repair showing prominent anterior leaflet prolapse and gross inspection of intramyocardial papillary fibrosis (white dense material) and absence of fibrosis in the apex tissue. Yellow color = fat**

**A**

| Patient    | Age | Leaflet Involvement |
|------------|-----|---------------------|
| MI-LVF-001 | 62  | P2                  |
| MI-LVF-002 | 53  | P1, P2, P3          |
| MI-LVF-003 | 55  | P2                  |
| MI-LVF-004 | 69  | P2                  |
| MI-LVF-005 | 61  | A2, P2              |
| MI-LVF-006 | 58  | A3, P3              |

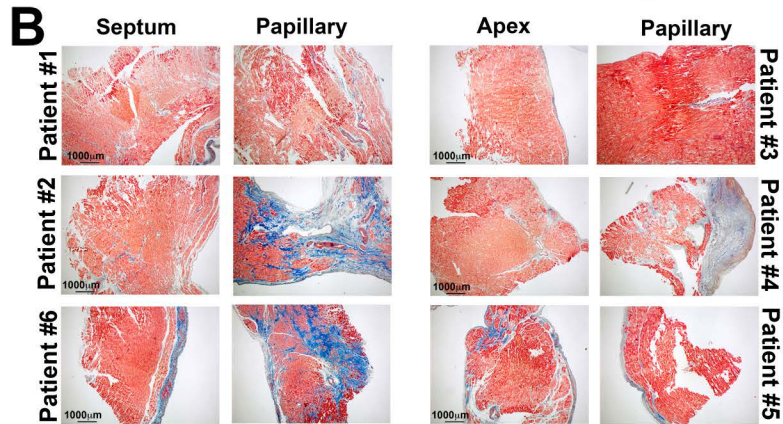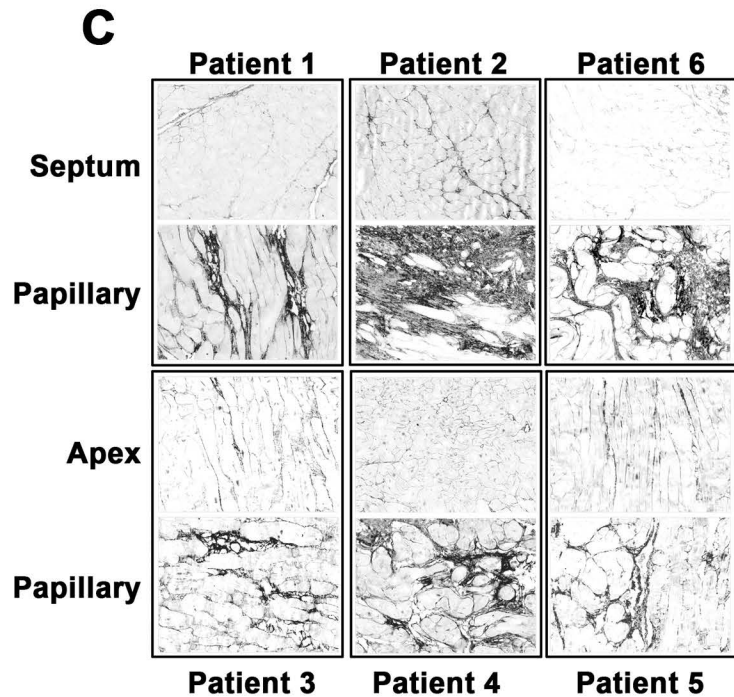

**Figure S1**

**Apex**

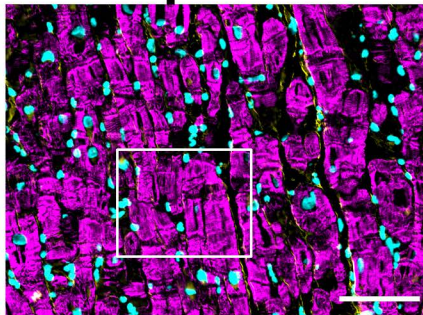

**Papillary**

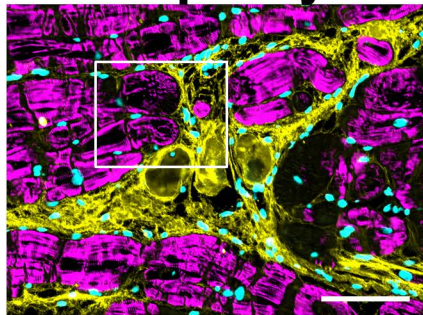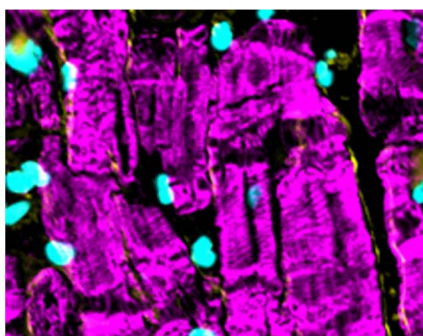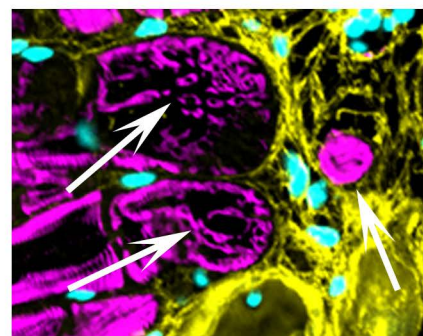

**Collagen/Myocytes/Nuclei**

**Figure S2**

Septum

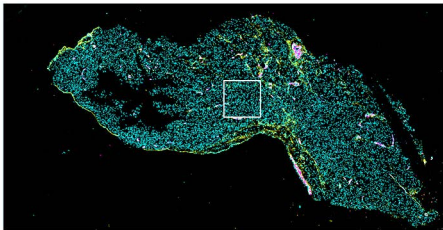

Papillary

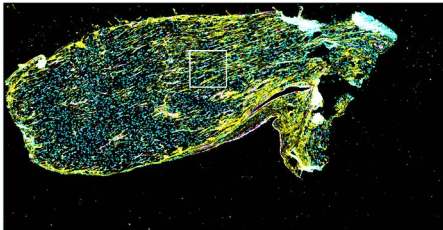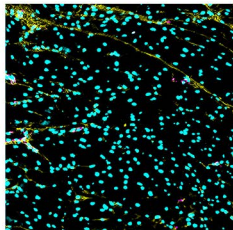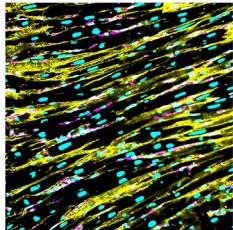

Collagen/CD163/Hoechst

**Figure S3**

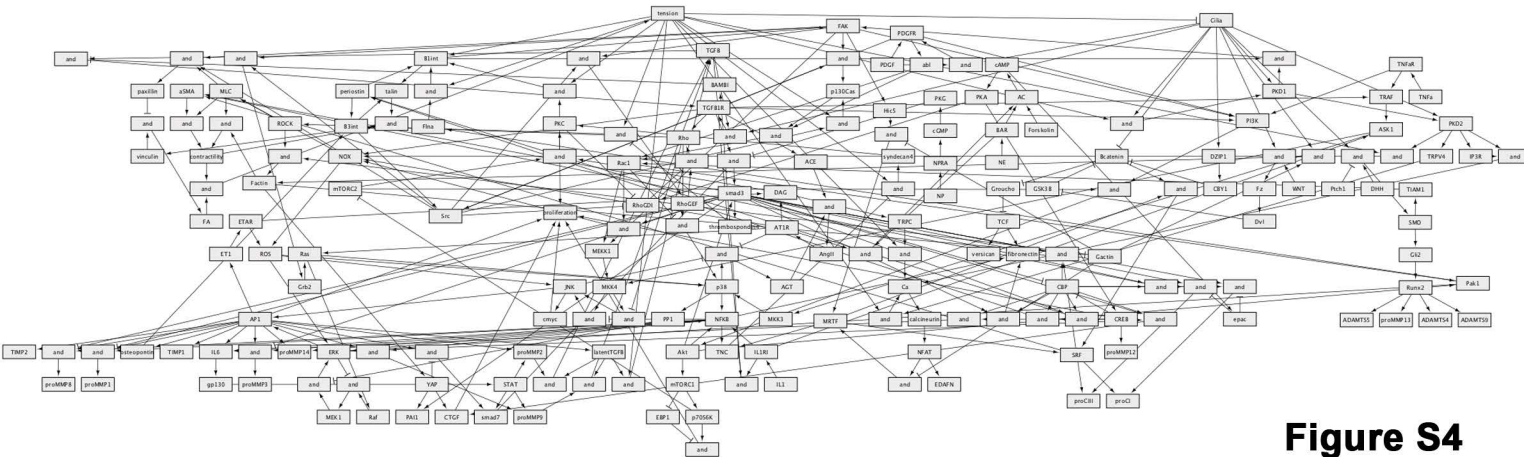

**Figure S4**
